# Supplementary material for: The use of nebulized pharmacotherapies during the COVID-19 pandemic
Source: PubMed Central journal article supplement — Ther Adv Respir Dis. 2020 Nov 9;14:1753466620954366. doi: 10.1177/1753466620954366 (PMC7675890; doi:10.1177/1753466620954366), 2020-11-09
Supplement: Reviewer_1_v.1.pdf [file Reviewer_1_v.1.pdf]

Reviewer 1 v.1

Comments to the Author

It is an important paper with a clear message and fine style.
